# Supplementary material
Source: MDPI journal article supplement (https://www.mdpi.com/2079-9276/12/12/139)
Supplement: s1 [file s1]

**Table S1** - Cyranose-320 parameters setting.

| Method setting                 | Parameter setting | Pump speed |
|--------------------------------|-------------------|------------|
| Baseline purge                 | 10 sec            | Medium     |
| Sample draw                    | 10 sec            | Medium     |
| Air intake purge               | 5 sec             | High       |
| Sample gas purge               | 30 sec            | High       |
| Digital filtering              | On                |            |
| Substrate heater               | On: 42°C          |            |
| Training repeat count 1        | 1                 |            |
| Identifying repeat count 1     | 1                 |            |
| Statistical analysis by PCnose |                   |            |
| Algorithm                      | Canonical         |            |
| Pre-processing                 | Auto-scaling      |            |
| Normalization                  | Normalization 1   |            |
| Identification Quality         | Medium            |            |

**Table S2** – Comparison by Kolmogorov-Smirnov of the 32 sensors' response between the 14 wild mushroom and truffle species.  
This table shows the p-values summary where values with p<0.05 are presented in bold. (Cont.)

| Sensor | <i>Agaricus xanthodermus</i> vs  |                               |                                       |                                  |                                  |                                    |                            |                              |                                 |                     |                                  |                               |                              |
|--------|----------------------------------|-------------------------------|---------------------------------------|----------------------------------|----------------------------------|------------------------------------|----------------------------|------------------------------|---------------------------------|---------------------|----------------------------------|-------------------------------|------------------------------|
|        | <i>Cyclocybe<br/>cylindracea</i> | <i>Amanita<br/>phalloides</i> | <i>Amanita<br/>subparvipantherina</i> | <i>Cantharellus<br/>cibarius</i> | <i>Craterellus<br/>lutescens</i> | <i>Craterellus<br/>tubaeformis</i> | <i>Hydnum<br/>repandum</i> | <i>Hygrocybe<br/>helobia</i> | <i>Lactarius<br/>deliciosus</i> | <i>Lepista nuda</i> | <i>Pisolithus<br/>tinctorius</i> | <i>Suillus<br/>collinitus</i> | <i>Terfezia<br/>arenaria</i> |
| S1     | <b>0.001</b>                     | <b>&lt;0,0001</b>             | <b>&lt;0,0001</b>                     | <b>0.015</b>                     | <b>&lt;0,0001</b>                | <b>0.003</b>                       | <b>&lt;0,0001</b>          | <b>&lt;0,0001</b>            | <b>&lt;0,0001</b>               | <b>&lt;0,0001</b>   | <b>0.003</b>                     | <b>0.003</b>                  | <b>&lt;0,0001</b>            |
| S2     | <b>0.001</b>                     | <b>&lt;0,0001</b>             | <b>&lt;0,0001</b>                     | 0.164                            | <b>&lt;0,0001</b>                | 0.055                              | <b>&lt;0,0001</b>          | <b>0.003</b>                 | <b>&lt;0,0001</b>               | <b>&lt;0,0001</b>   | <b>0.015</b>                     | <b>0.003</b>                  | <b>&lt;0,0001</b>            |
| S3     | <b>0.001</b>                     | <b>&lt;0,0001</b>             | <b>&lt;0,0001</b>                     | 0.164                            | <b>&lt;0,0001</b>                | <b>0.015</b>                       | <b>&lt;0,0001</b>          | <b>&lt;0,0001</b>            | <b>&lt;0,0001</b>               | <b>&lt;0,0001</b>   | <b>0.003</b>                     | <b>0.001</b>                  | <b>&lt;0,0001</b>            |
| S4     | <b>0.003</b>                     | <b>0.003</b>                  | <b>&lt;0,0001</b>                     | 0.164                            | <b>&lt;0,0001</b>                | <b>0.015</b>                       | <b>&lt;0,0001</b>          | <b>0.015</b>                 | <b>&lt;0,0001</b>               | <b>&lt;0,0001</b>   | 0.759                            | <b>0.003</b>                  | <b>&lt;0,0001</b>            |
| S5     | <b>&lt;0,0001</b>                | <b>&lt;0,0001</b>             | <b>&lt;0,0001</b>                     | 0.759                            | <b>&lt;0,0001</b>                | 0.400                              | <b>&lt;0,0001</b>          | <b>0.001</b>                 | <b>&lt;0,0001</b>               | <b>&lt;0,0001</b>   | <b>0.015</b>                     | <b>0.003</b>                  | <b>&lt;0,0001</b>            |
| S6     | <b>&lt;0,0001</b>                | <b>&lt;0,0001</b>             | <b>0.001</b>                          | <b>&lt;0,0001</b>                | <b>&lt;0,0001</b>                | <b>0.001</b>                       | <b>&lt;0,0001</b>          | <b>&lt;0,0001</b>            | <b>&lt;0,0001</b>               | <b>&lt;0,0001</b>   | <b>&lt;0,0001</b>                | <b>&lt;0,0001</b>             | 0.400                        |
| S7     | <b>0.015</b>                     | <b>0.001</b>                  | <b>0.001</b>                          | 0.759                            | <b>&lt;0,0001</b>                | 0.400                              | <b>0.001</b>               | 0.055                        | <b>&lt;0,0001</b>               | <b>&lt;0,0001</b>   | 0.400                            | <b>0.003</b>                  | <b>&lt;0,0001</b>            |
| S8     | 0.055                            | <b>0.015</b>                  | <b>0.001</b>                          | 0.759                            | <b>&lt;0,0001</b>                | 0.055                              | <b>0.001</b>               | 0.055                        | <b>&lt;0,0001</b>               | <b>&lt;0,0001</b>   | 0.988                            | <b>0.015</b>                  | <b>&lt;0,0001</b>            |
| S9     | <b>0.015</b>                     | <b>0.001</b>                  | <b>&lt;0,0001</b>                     | 0.055                            | <b>&lt;0,0001</b>                | 0.988                              | <b>0.003</b>               | 0.164                        | <b>&lt;0,0001</b>               | <b>&lt;0,0001</b>   | 0.759                            | <b>0.015</b>                  | <b>&lt;0,0001</b>            |
| S10    | <b>&lt;0,0001</b>                | <b>&lt;0,0001</b>             | <b>&lt;0,0001</b>                     | 0.759                            | <b>&lt;0,0001</b>                | 0.055                              | <b>&lt;0,0001</b>          | <b>0.015</b>                 | <b>&lt;0,0001</b>               | <b>&lt;0,0001</b>   | 0.055                            | <b>0.001</b>                  | <b>&lt;0,0001</b>            |
| S11    | <b>0.001</b>                     | <b>&lt;0,0001</b>             | <b>&lt;0,0001</b>                     | 0.055                            | <b>&lt;0,0001</b>                | <b>0.003</b>                       | <b>&lt;0,0001</b>          | <b>&lt;0,0001</b>            | <b>&lt;0,0001</b>               | <b>&lt;0,0001</b>   | <b>0.001</b>                     | <b>0.001</b>                  | <b>0.001</b>                 |
| S12    | <b>0.003</b>                     | <b>&lt;0,0001</b>             | <b>&lt;0,0001</b>                     | 0.055                            | <b>&lt;0,0001</b>                | <b>0.015</b>                       | <b>&lt;0,0001</b>          | <b>0.003</b>                 | <b>&lt;0,0001</b>               | <b>&lt;0,0001</b>   | <b>0.015</b>                     | <b>0.003</b>                  | <b>&lt;0,0001</b>            |
| S13    | <b>0.001</b>                     | <b>&lt;0,0001</b>             | <b>&lt;0,0001</b>                     | 0.759                            | <b>&lt;0,0001</b>                | 0.055                              | <b>&lt;0,0001</b>          | <b>0.015</b>                 | <b>&lt;0,0001</b>               | <b>&lt;0,0001</b>   | 0.400                            | <b>0.001</b>                  | <b>&lt;0,0001</b>            |
| S14    | <b>0.003</b>                     | <b>&lt;0,0001</b>             | <b>&lt;0,0001</b>                     | 0.759                            | <b>&lt;0,0001</b>                | 0.055                              | <b>&lt;0,0001</b>          | <b>0.003</b>                 | <b>&lt;0,0001</b>               | <b>&lt;0,0001</b>   | 0.055                            | <b>0.003</b>                  | <b>&lt;0,0001</b>            |
| S15    | <b>&lt;0,0001</b>                | <b>&lt;0,0001</b>             | <b>&lt;0,0001</b>                     | 0.759                            | <b>&lt;0,0001</b>                | 0.055                              | <b>&lt;0,0001</b>          | <b>0.001</b>                 | <b>&lt;0,0001</b>               | <b>&lt;0,0001</b>   | 0.055                            | <b>0.001</b>                  | <b>&lt;0,0001</b>            |
| S16    | <b>0.001</b>                     | <b>0.001</b>                  | <b>&lt;0,0001</b>                     | 0.164                            | <b>&lt;0,0001</b>                | 0.400                              | <b>&lt;0,0001</b>          | <b>0.003</b>                 | <b>&lt;0,0001</b>               | <b>&lt;0,0001</b>   | 0.400                            | <b>0.003</b>                  | <b>&lt;0,0001</b>            |
| S17    | <b>0.001</b>                     | <b>&lt;0,0001</b>             | <b>&lt;0,0001</b>                     | 0.988                            | <b>&lt;0,0001</b>                | 0.400                              | <b>&lt;0,0001</b>          | <b>0.003</b>                 | <b>&lt;0,0001</b>               | <b>&lt;0,0001</b>   | 0.055                            | <b>0.003</b>                  | <b>&lt;0,0001</b>            |
| S18    | <b>0.015</b>                     | <b>0.003</b>                  | <b>0.001</b>                          | 0.055                            | <b>&lt;0,0001</b>                | 0.759                              | <b>0.001</b>               | 0.055                        | <b>&lt;0,0001</b>               | <b>&lt;0,0001</b>   | 0.759                            | <b>0.015</b>                  | <b>&lt;0,0001</b>            |
| S19    | <b>0.001</b>                     | <b>0.001</b>                  | <b>0.001</b>                          | 0.988                            | <b>&lt;0,0001</b>                | 0.164                              | <b>0.001</b>               | <b>0.015</b>                 | <b>&lt;0,0001</b>               | <b>&lt;0,0001</b>   | 0.400                            | <b>0.003</b>                  | <b>&lt;0,0001</b>            |
| S20    | <b>&lt;0,0001</b>                | <b>&lt;0,0001</b>             | <b>&lt;0,0001</b>                     | <b>0.003</b>                     | <b>&lt;0,0001</b>                | <b>0.003</b>                       | <b>&lt;0,0001</b>          | <b>&lt;0,0001</b>            | <b>&lt;0,0001</b>               | <b>&lt;0,0001</b>   | <b>&lt;0,0001</b>                | <b>0.001</b>                  | <b>&lt;0,0001</b>            |
| S21    | <b>&lt;0,0001</b>                | <b>&lt;0,0001</b>             | <b>&lt;0,0001</b>                     | 0.164                            | <b>&lt;0,0001</b>                | <b>0.015</b>                       | <b>&lt;0,0001</b>          | <b>0.001</b>                 | <b>&lt;0,0001</b>               | <b>&lt;0,0001</b>   | <b>0.015</b>                     | <b>0.001</b>                  | <b>0.001</b>                 |
| S22    | <b>&lt;0,0001</b>                | <b>&lt;0,0001</b>             | <b>&lt;0,0001</b>                     | 0.164                            | <b>&lt;0,0001</b>                | <b>0.015</b>                       | <b>&lt;0,0001</b>          | <b>0.001</b>                 | <b>&lt;0,0001</b>               | <b>&lt;0,0001</b>   | 0.055                            | <b>0.003</b>                  | <b>&lt;0,0001</b>            |
| S23    | <b>&lt;0,0001</b>                | <b>&lt;0,0001</b>             | <b>&lt;0,0001</b>                     | 0.164                            | <b>&lt;0,0001</b>                | 0.055                              | <b>&lt;0,0001</b>          | <b>&lt;0,0001</b>            | <b>&lt;0,0001</b>               | <b>&lt;0,0001</b>   | <b>0.003</b>                     | <b>0.003</b>                  | <b>0.003</b>                 |
| S24    | <b>0.015</b>                     | 0.164                         | <b>0.003</b>                          | 0.400                            | <b>0.003</b>                     | 0.759                              | 0.055                      | 0.400                        | <b>0.003</b>                    | <b>0.003</b>        | 0.055                            | 0.164                         | <b>&lt;0,0001</b>            |
| S25    | 0.400                            | 0.400                         | <b>&lt;0,0001</b>                     | <b>&lt;0,0001</b>                | <b>&lt;0,0001</b>                | <b>0.003</b>                       | 0.759                      | 0.055                        | <b>&lt;0,0001</b>               | <b>&lt;0,0001</b>   | <b>0.003</b>                     | 0.164                         | <b>&lt;0,0001</b>            |
| S26    | 0.164                            | 0.400                         | 0.055                                 | 0.164                            | <b>0.015</b>                     | 0.055                              | <b>0.015</b>               | 0.400                        | 0.400                           | 0.400               | 0.400                            | 0.400                         | <b>&lt;0,0001</b>            |
| S27    | <b>0.015</b>                     | <b>&lt;0,0001</b>             | <b>&lt;0,0001</b>                     | 0.164                            | <b>&lt;0,0001</b>                | <b>0.015</b>                       | <b>&lt;0,0001</b>          | <b>0.001</b>                 | <b>&lt;0,0001</b>               | <b>&lt;0,0001</b>   | <b>0.015</b>                     | <b>0.003</b>                  | <b>&lt;0,0001</b>            |
| S28    | 0.055                            | <b>0.015</b>                  | <b>&lt;0,0001</b>                     | <b>0.015</b>                     | <b>&lt;0,0001</b>                | 0.988                              | <b>0.001</b>               | 0.400                        | <b>&lt;0,0001</b>               | <b>&lt;0,0001</b>   | 0.164                            | <b>0.015</b>                  | <b>&lt;0,0001</b>            |
| S29    | <b>0.001</b>                     | <b>&lt;0,0001</b>             | <b>&lt;0,0001</b>                     | 0.400                            | <b>&lt;0,0001</b>                | 0.055                              | <b>&lt;0,0001</b>          | <b>0.001</b>                 | <b>&lt;0,0001</b>               | <b>&lt;0,0001</b>   | <b>0.015</b>                     | <b>0.003</b>                  | <b>&lt;0,0001</b>            |
| S30    | <b>&lt;0,0001</b>                | <b>&lt;0,0001</b>             | 0.164                                 | 0.759                            | <b>0.001</b>                     | 0.400                              | <b>0.003</b>               | 0.164                        | <b>0.001</b>                    | <b>0.001</b>        | 0.400                            | <b>0.001</b>                  | 0.400                        |
| S31    | <b>&lt;0,0001</b>                | <b>&lt;0,0001</b>             | <b>&lt;0,0001</b>                     | 0.055                            | <b>&lt;0,0001</b>                | <b>0.015</b>                       | <b>&lt;0,0001</b>          | <b>&lt;0,0001</b>            | <b>&lt;0,0001</b>               | <b>&lt;0,0001</b>   | <b>&lt;0,0001</b>                | <b>0.015</b>                  | <b>0.001</b>                 |
| S32    | <b>0.015</b>                     | <b>0.001</b>                  | <b>&lt;0,0001</b>                     | 0.164                            | <b>&lt;0,0001</b>                | 0.164                              | <b>&lt;0,0001</b>          | <b>0.003</b>                 | <b>&lt;0,0001</b>               | <b>&lt;0,0001</b>   | 0.055                            | <b>0.015</b>                  | <b>&lt;0,0001</b>            |

Table S2 – cont.

| Sensor | <i>Cyclocybe cylindracea</i> vs |                                   |                              |                              |                                |                        |                          |                             |                     |                              |                           |                          |
|--------|---------------------------------|-----------------------------------|------------------------------|------------------------------|--------------------------------|------------------------|--------------------------|-----------------------------|---------------------|------------------------------|---------------------------|--------------------------|
|        | <i>Amanita phalloides</i>       | <i>Amanita subparvipantherina</i> | <i>Cantharellus cibarius</i> | <i>Craterellus lutescens</i> | <i>Craterellus tubaeformis</i> | <i>Hydnum repandum</i> | <i>Hygrocybe helobia</i> | <i>Lactarius deliciosus</i> | <i>Lepista nuda</i> | <i>Pisolithus tinctorius</i> | <i>Suillus collinitus</i> | <i>Terfezia arenaria</i> |
| S1     | 0.759                           | <b>0.001</b>                      | 0.164                        | <0,0001                      | 0.988                          | <0,0001                | 0.988                    | <0,0001                     | <0,0001             | <b>0.015</b>                 | 0.055                     | <0,0001                  |
| S2     | 0.055                           | <b>0.003</b>                      | <b>0.001</b>                 | <0,0001                      | 0.400                          | <b>0.003</b>           | 0.759                    | <0,0001                     | <0,0001             | 0.055                        | 0.164                     | <0,0001                  |
| S3     | 0.400                           | 0.055                             | <b>0.001</b>                 | <0,0001                      | 0.164                          | 0.164                  | 0.400                    | <0,0001                     | <0,0001             | <b>0.003</b>                 | 0.055                     | <0,0001                  |
| S4     | 0.759                           | 0.055                             | 0.164                        | <0,0001                      | 0.055                          | 0.400                  | 0.759                    | <0,0001                     | <0,0001             | 0.055                        | 0.988                     | <0,0001                  |
| S5     | 0.164                           | <0,0001                           | <0,0001                      | <0,0001                      | <b>0.001</b>                   | 0.400                  | <b>0.001</b>             | <0,0001                     | <0,0001             | <0,0001                      | 0.055                     | <0,0001                  |
| S6     | <0,0001                         | <0,0001                           | <0,0001                      | <0,0001                      | <0,0001                        | <b>0.001</b>           | <0,0001                  | <0,0001                     | <0,0001             | <0,0001                      | <b>0.001</b>              | <0,0001                  |
| S7     | 0.988                           | 0.164                             | <b>0.001</b>                 | <0,0001                      | 0.164                          | 0.759                  | 0.164                    | <0,0001                     | <0,0001             | <b>0.001</b>                 | 0.164                     | <0,0001                  |
| S8     | 0.988                           | <b>0.003</b>                      | 0.164                        | <0,0001                      | 0.988                          | 0.055                  | 0.400                    | <0,0001                     | <0,0001             | 0.055                        | 0.055                     | <0,0001                  |
| S9     | 0.759                           | <0,0001                           | <b>0.001</b>                 | <0,0001                      | <b>0.015</b>                   | 0.759                  | <b>0.015</b>             | <0,0001                     | <0,0001             | <b>0.003</b>                 | <b>0.015</b>              | <0,0001                  |
| S10    | 0.055                           | 0.988                             | <0,0001                      | <0,0001                      | <b>0.001</b>                   | 0.164                  | <b>0.001</b>             | <0,0001                     | <0,0001             | <0,0001                      | 0.164                     | <0,0001                  |
| S11    | 0.164                           | 0.400                             | <b>0.001</b>                 | <0,0001                      | 0.055                          | 0.164                  | <b>0.003</b>             | <0,0001                     | <0,0001             | <b>0.001</b>                 | 0.055                     | <0,0001                  |
| S12    | 0.759                           | 0.055                             | <b>0.015</b>                 | <0,0001                      | 0.759                          | 0.164                  | <b>0.015</b>             | <0,0001                     | <0,0001             | <b>0.001</b>                 | 0.055                     | <0,0001                  |
| S13    | 0.988                           | <b>0.015</b>                      | <b>0.015</b>                 | <0,0001                      | 0.164                          | 0.759                  | 0.164                    | <0,0001                     | <0,0001             | <b>0.001</b>                 | 0.055                     | <0,0001                  |
| S14    | 0.759                           | <b>0.001</b>                      | <b>0.003</b>                 | <0,0001                      | 0.400                          | <b>0.015</b>           | <b>0.015</b>             | <0,0001                     | <0,0001             | <b>0.003</b>                 | <b>0.015</b>              | <0,0001                  |
| S15    | 0.164                           | 0.400                             | <0,0001                      | <0,0001                      | <b>0.003</b>                   | <b>0.015</b>           | <b>0.003</b>             | <0,0001                     | <0,0001             | <0,0001                      | 0.055                     | <0,0001                  |
| S16    | 0.164                           | 0.164                             | <0,0001                      | <0,0001                      | <b>0.001</b>                   | 0.055                  | <b>0.001</b>             | <0,0001                     | <0,0001             | <0,0001                      | 0.055                     | <0,0001                  |
| S17    | 0.400                           | 0.055                             | <0,0001                      | <0,0001                      | <b>0.003</b>                   | 0.759                  | <b>0.003</b>             | <0,0001                     | <0,0001             | <0,0001                      | 0.164                     | <0,0001                  |
| S18    | 0.759                           | 0.055                             | <b>0.001</b>                 | <0,0001                      | <b>0.003</b>                   | 0.400                  | <b>0.015</b>             | <0,0001                     | <0,0001             | <b>0.001</b>                 | 0.400                     | <0,0001                  |
| S19    | 0.988                           | 0.055                             | <0,0001                      | <0,0001                      | <b>0.001</b>                   | 0.759                  | <b>0.001</b>             | <0,0001                     | <0,0001             | <0,0001                      | 0.164                     | <0,0001                  |
| S20    | 0.759                           | <b>0.003</b>                      | <b>0.015</b>                 | <0,0001                      | 0.164                          | <b>0.003</b>           | 0.164                    | <0,0001                     | <0,0001             | <b>0.003</b>                 | 0.055                     | <0,0001                  |
| S21    | 0.400                           | 0.988                             | <b>0.001</b>                 | <0,0001                      | <b>0.003</b>                   | 0.759                  | <b>0.003</b>             | <0,0001                     | <0,0001             | <0,0001                      | <b>0.015</b>              | <0,0001                  |
| S22    | 0.055                           | <b>0.003</b>                      | <0,0001                      | <0,0001                      | <b>0.001</b>                   | 0.759                  | <b>0.001</b>             | <0,0001                     | <0,0001             | <0,0001                      | 0.164                     | <0,0001                  |
| S23    | 0.055                           | 0.400                             | <0,0001                      | <0,0001                      | <b>0.001</b>                   | 0.164                  | <b>0.001</b>             | <0,0001                     | <0,0001             | <0,0001                      | 0.164                     | <0,0001                  |
| S24    | 0.055                           | 0.055                             | <0,0001                      | 0.055                        | <b>0.001</b>                   | 0.759                  | <0,0001                  | 0.055                       | 0.055               | <0,0001                      | 0.400                     | <0,0001                  |
| S25    | 0.055                           | <0,0001                           | <0,0001                      | <0,0001                      | <b>0.003</b>                   | 0.988                  | 0.164                    | <0,0001                     | <0,0001             | <b>0.015</b>                 | <b>0.015</b>              | <0,0001                  |
| S26    | 0.164                           | 0.055                             | <b>0.001</b>                 | <b>0.015</b>                 | <b>0.001</b>                   | 0.759                  | <b>0.015</b>             | 0.164                       | 0.164               | <b>0.003</b>                 | 0.759                     | <0,0001                  |
| S27    | <b>0.015</b>                    | <0,0001                           | 0.164                        | <0,0001                      | 0.400                          | <0,0001                | 0.400                    | <0,0001                     | <0,0001             | <b>0.015</b>                 | <b>0.003</b>              | <0,0001                  |
| S28    | 0.759                           | <0,0001                           | <0,0001                      | <0,0001                      | <b>0.015</b>                   | 0.400                  | <b>0.015</b>             | <0,0001                     | <0,0001             | <b>0.001</b>                 | <b>0.015</b>              | <0,0001                  |
| S29    | 0.164                           | <b>0.003</b>                      | <b>0.001</b>                 | <0,0001                      | <b>0.015</b>                   | 0.164                  | <b>0.003</b>             | <0,0001                     | <0,0001             | <b>0.001</b>                 | 0.055                     | <0,0001                  |
| S30    | 0.164                           | <0,0001                           | <0,0001                      | <0,0001                      | <0,0001                        | <b>0.001</b>           | <0,0001                  | <0,0001                     | <0,0001             | <0,0001                      | 0.055                     | <0,0001                  |
| S31    | <b>0.001</b>                    | <0,0001                           | <b>0.001</b>                 | <0,0001                      | 0.400                          | <0,0001                | <b>0.001</b>             | <0,0001                     | <0,0001             | 0.759                        | 0.164                     | <b>0.015</b>             |
| S32    | 0.400                           | <0,0001                           | <b>0.003</b>                 | <0,0001                      | 0.759                          | <b>0.015</b>           | 0.988                    | <0,0001                     | <0,0001             | 0.164                        | <b>0.015</b>              | <0,0001                  |

Table S2 – cont.

| Sensor | <i>Amanita phalloides</i> vs      |                              |                              |                                |                        |                          |                             |                     |                              |                           |                          |
|--------|-----------------------------------|------------------------------|------------------------------|--------------------------------|------------------------|--------------------------|-----------------------------|---------------------|------------------------------|---------------------------|--------------------------|
|        | <i>Amanita subparvipantherina</i> | <i>Cantharellus cibarius</i> | <i>Craterellus lutescens</i> | <i>Craterellus tubaeformis</i> | <i>Hydnum repandum</i> | <i>Hygrocybe helobia</i> | <i>Lactarius deliciosus</i> | <i>Lepista nuda</i> | <i>Pisolithus tinctorius</i> | <i>Suillus collinitus</i> | <i>Terfezia arenaria</i> |
| S1     | 0.003                             | 0.003                        | <0,0001                      | 0.400                          | 0.015                  | 0.759                    | <0,0001                     | <0,0001             | <0,0001                      | 0.164                     | <0,0001                  |
| S2     | 0.055                             | <0,0001                      | <0,0001                      | 0.015                          | 0.055                  | 0.015                    | <0,0001                     | <0,0001             | <0,0001                      | 0.400                     | <0,0001                  |
| S3     | 0.400                             | <0,0001                      | <0,0001                      | 0.055                          | 0.400                  | 0.164                    | <0,0001                     | <0,0001             | 0.003                        | 0.759                     | <0,0001                  |
| S4     | 0.055                             | 0.164                        | <0,0001                      | 0.400                          | 0.055                  | 0.988                    | <0,0001                     | <0,0001             | 0.164                        | 0.759                     | <0,0001                  |
| S5     | <0,0001                           | <0,0001                      | <0,0001                      | 0.001                          | 0.164                  | 0.015                    | <0,0001                     | <0,0001             | <0,0001                      | 0.055                     | <0,0001                  |
| S6     | <0,0001                           | <0,0001                      | <0,0001                      | <0,0001                        | <0,0001                | <0,0001                  | <0,0001                     | <0,0001             | <0,0001                      | 0.015                     | <0,0001                  |
| S7     | 0.164                             | <0,0001                      | <0,0001                      | 0.015                          | 0.400                  | 0.015                    | <0,0001                     | <0,0001             | <0,0001                      | 0.164                     | <0,0001                  |
| S8     | 0.015                             | 0.055                        | <0,0001                      | 0.759                          | 0.055                  | 0.759                    | <0,0001                     | <0,0001             | 0.015                        | 0.164                     | <0,0001                  |
| S9     | <0,0001                           | <0,0001                      | <0,0001                      | 0.001                          | 0.759                  | 0.003                    | <0,0001                     | <0,0001             | <0,0001                      | 0.055                     | <0,0001                  |
| S10    | 0.015                             | <0,0001                      | <0,0001                      | 0.015                          | 0.400                  | 0.055                    | <0,0001                     | <0,0001             | <0,0001                      | 0.055                     | <0,0001                  |
| S11    | 0.164                             | 0.001                        | <0,0001                      | 0.400                          | 0.003                  | 0.015                    | <0,0001                     | <0,0001             | 0.001                        | 0.015                     | <0,0001                  |
| S12    | 0.015                             | 0.001                        | <0,0001                      | 0.164                          | 0.055                  | 0.001                    | <0,0001                     | <0,0001             | <0,0001                      | 0.055                     | <0,0001                  |
| S13    | 0.015                             | 0.001                        | <0,0001                      | 0.164                          | 0.164                  | 0.055                    | <0,0001                     | <0,0001             | <0,0001                      | 0.055                     | <0,0001                  |
| S14    | 0.003                             | <0,0001                      | <0,0001                      | 0.055                          | 0.015                  | 0.003                    | <0,0001                     | <0,0001             | <0,0001                      | 0.055                     | <0,0001                  |
| S15    | 0.164                             | <0,0001                      | <0,0001                      | 0.015                          | 0.759                  | 0.015                    | <0,0001                     | <0,0001             | <0,0001                      | 0.055                     | <0,0001                  |
| S16    | 0.001                             | <0,0001                      | <0,0001                      | 0.055                          | 0.164                  | 0.055                    | <0,0001                     | <0,0001             | <0,0001                      | 0.055                     | <0,0001                  |
| S17    | 0.001                             | <0,0001                      | <0,0001                      | 0.003                          | 0.400                  | 0.003                    | <0,0001                     | <0,0001             | <0,0001                      | 0.015                     | <0,0001                  |
| S18    | 0.003                             | <0,0001                      | <0,0001                      | <0,0001                        | 0.988                  | 0.003                    | <0,0001                     | <0,0001             | <0,0001                      | 0.055                     | <0,0001                  |
| S19    | 0.055                             | <0,0001                      | <0,0001                      | 0.003                          | 0.759                  | 0.001                    | <0,0001                     | <0,0001             | <0,0001                      | 0.055                     | <0,0001                  |
| S20    | 0.003                             | 0.003                        | <0,0001                      | 0.400                          | 0.003                  | 0.988                    | <0,0001                     | <0,0001             | 0.003                        | 0.055                     | <0,0001                  |
| S21    | 0.055                             | <0,0001                      | <0,0001                      | 0.055                          | 0.164                  | 0.015                    | <0,0001                     | <0,0001             | <0,0001                      | 0.015                     | <0,0001                  |
| S22    | <0,0001                           | <0,0001                      | <0,0001                      | 0.400                          | 0.055                  | 0.164                    | <0,0001                     | <0,0001             | <0,0001                      | 0.015                     | <0,0001                  |
| S23    | 0.003                             | <0,0001                      | <0,0001                      | 0.015                          | 0.015                  | 0.164                    | <0,0001                     | <0,0001             | <0,0001                      | 0.164                     | <0,0001                  |
| S24    | 0.003                             | 0.003                        | 0.001                        | 0.015                          | 0.400                  | 0.055                    | 0.001                       | 0.003               | <0,0001                      | 0.400                     | <0,0001                  |
| S25    | <0,0001                           | <0,0001                      | <0,0001                      | <0,0001                        | 0.164                  | 0.015                    | <0,0001                     | <0,0001             | <0,0001                      | 0.164                     | <0,0001                  |
| S26    | 0.003                             | 0.001                        | 0.003                        | 0.015                          | 0.055                  | 0.759                    | 0.003                       | 0.003               | 0.015                        | 0.400                     | <0,0001                  |
| S27    | <0,0001                           | <0,0001                      | <0,0001                      | 0.164                          | 0.015                  | 0.055                    | <0,0001                     | <0,0001             | <0,0001                      | 0.055                     | <0,0001                  |
| S28    | 0.001                             | <0,0001                      | <0,0001                      | 0.003                          | 0.400                  | 0.003                    | <0,0001                     | <0,0001             | <0,0001                      | 0.055                     | <0,0001                  |
| S29    | <0,0001                           | <0,0001                      | <0,0001                      | 0.164                          | 0.001                  | 0.003                    | <0,0001                     | <0,0001             | <0,0001                      | 0.015                     | <0,0001                  |
| S30    | 0.001                             | <0,0001                      | <0,0001                      | <0,0001                        | 0.015                  | <0,0001                  | <0,0001                     | 0.003               | <0,0001                      | 0.400                     | 0.015                    |
| S31    | 0.164                             | <0,0001                      | <0,0001                      | 0.015                          | <0,0001                | 0.759                    | <0,0001                     | <0,0001             | 0.015                        | 0.164                     | <0,0001                  |
| S32    | <0,0001                           | <0,0001                      | <0,0001                      | 0.055                          | 0.015                  | 0.400                    | <0,0001                     | <0,0001             | 0.015                        | 0.055                     | <0,0001                  |

| Amanita subparvipantherina vs |                       |                       |                         |                 |                   |                      |              |                       |                    |                   |
|-------------------------------|-----------------------|-----------------------|-------------------------|-----------------|-------------------|----------------------|--------------|-----------------------|--------------------|-------------------|
| Sensor                        | Cantharellus cibarius | Craterellus lutescens | Craterellus tubaeformis | Hydnum repandum | Hygrocybe helobia | Lactarius deliciosus | Lepista nuda | Pisolithus tinctorius | Suillus collinitus | Terfezia arenaria |
| S1                            | 0.001                 | <0,0001               | 0.015                   | 0.164           | 0.001             | <0,0001              | <0,0001      | <0,0001               | 0.164              | <0,0001           |
| S2                            | <0,0001               | <0,0001               | 0.003                   | 0.055           | 0.001             | <0,0001              | <0,0001      | <0,0001               | 0.400              | <0,0001           |
| S3                            | <0,0001               | <0,0001               | 0.001                   | 0.015           | 0.003             | <0,0001              | <0,0001      | <0,0001               | 0.759              | <0,0001           |
| S4                            | 0.001                 | 0.055                 | 0.001                   | 0.164           | 0.015             | 0.164                | 0.015        | 0.001                 | 0.400              | <0,0001           |
| S5                            | <0,0001               | <0,0001               | <0,0001                 | <0,0001         | <0,0001           | <0,0001              | <0,0001      | <0,0001               | 0.400              | <0,0001           |
| S6                            | 0.003                 | <0,0001               | 0.055                   | <0,0001         | 0.015             | <0,0001              | <0,0001      | 0.055                 | 0.001              | 0.003             |
| S7                            | <0,0001               | <0,0001               | 0.015                   | 0.400           | 0.001             | <0,0001              | <0,0001      | <0,0001               | 0.759              | <0,0001           |
| S8                            | 0.003                 | 0.003                 | 0.055                   | 0.400           | 0.400             | 0.015                | 0.003        | <0,0001               | 0.759              | <0,0001           |
| S9                            | <0,0001               | <0,0001               | <0,0001                 | <0,0001         | <0,0001           | <0,0001              | <0,0001      | <0,0001               | 0.003              | <0,0001           |
| S10                           | <0,0001               | <0,0001               | <0,0001                 | 0.015           | <0,0001           | <0,0001              | <0,0001      | <0,0001               | 0.759              | <0,0001           |
| S11                           | <0,0001               | <0,0001               | 0.015                   | 0.759           | <0,0001           | <0,0001              | <0,0001      | <0,0001               | 0.055              | <0,0001           |
| S12                           | <0,0001               | <0,0001               | 0.003                   | 0.055           | <0,0001           | <0,0001              | <0,0001      | <0,0001               | 0.759              | <0,0001           |
| S13                           | <0,0001               | <0,0001               | 0.001                   | 0.015           | 0.001             | <0,0001              | <0,0001      | <0,0001               | 0.759              | <0,0001           |
| S14                           | <0,0001               | <0,0001               | <0,0001                 | 0.003           | <0,0001           | <0,0001              | <0,0001      | <0,0001               | 0.759              | <0,0001           |
| S15                           | <0,0001               | <0,0001               | 0.001                   | 0.015           | 0.001             | <0,0001              | <0,0001      | <0,0001               | 0.164              | <0,0001           |
| S16                           | <0,0001               | <0,0001               | <0,0001                 | 0.001           | <0,0001           | <0,0001              | <0,0001      | <0,0001               | 0.759              | <0,0001           |
| S17                           | <0,0001               | <0,0001               | <0,0001                 | 0.001           | <0,0001           | <0,0001              | <0,0001      | <0,0001               | 0.759              | <0,0001           |
| S18                           | <0,0001               | <0,0001               | <0,0001                 | 0.003           | <0,0001           | <0,0001              | <0,0001      | <0,0001               | 0.759              | <0,0001           |
| S19                           | <0,0001               | <0,0001               | <0,0001                 | 0.003           | 0.001             | <0,0001              | <0,0001      | <0,0001               | 0.759              | <0,0001           |
| S20                           | <0,0001               | <0,0001               | 0.001                   | 0.759           | 0.001             | <0,0001              | <0,0001      | <0,0001               | 0.759              | <0,0001           |
| S21                           | <0,0001               | <0,0001               | <0,0001                 | 0.759           | <0,0001           | <0,0001              | <0,0001      | <0,0001               | 0.055              | <0,0001           |
| S22                           | <0,0001               | <0,0001               | <0,0001                 | <0,0001         | <0,0001           | <0,0001              | <0,0001      | <0,0001               | 0.164              | <0,0001           |
| S23                           | <0,0001               | <0,0001               | <0,0001                 | 0.015           | <0,0001           | <0,0001              | <0,0001      | <0,0001               | 0.759              | <0,0001           |
| S24                           | <0,0001               | 0.759                 | <0,0001                 | 0.003           | <0,0001           | 0.055                | 0.055        | <0,0001               | 0.015              | <0,0001           |
| S25                           | <0,0001               | <0,0001               | <0,0001                 | <0,0001         | <0,0001           | 0.001                | 0.001        | <0,0001               | 0.001              | <0,0001           |
| S26                           | 0.001                 | 0.055                 | <0,0001                 | 0.164           | 0.015             | 0.400                | 0.400        | 0.003                 | 0.015              | <0,0001           |
| S27                           | <0,0001               | <0,0001               | <0,0001                 | 0.003           | <0,0001           | 0.001                | 0.001        | <0,0001               | 0.055              | <0,0001           |
| S28                           | <0,0001               | <0,0001               | <0,0001                 | <0,0001         | <0,0001           | <0,0001              | <0,0001      | <0,0001               | 0.400              | <0,0001           |
| S29                           | <0,0001               | <0,0001               | <0,0001                 | 0.003           | <0,0001           | 0.001                | <0,0001      | <0,0001               | 0.400              | <0,0001           |
| S30                           | 0.055                 | 0.015                 | 0.055                   | 0.400           | 0.015             | 0.055                | 0.015        | 0.164                 | 0.055              | 0.400             |
| S31                           | <0,0001               | <0,0001               | 0.003                   | 0.001           | 0.759             | <0,0001              | <0,0001      | 0.001                 | 0.015              | <0,0001           |
| S32                           | <0,0001               | <0,0001               | <0,0001                 | <0,0001         | <0,0001           | <0,0001              | <0,0001      | <0,0001               | 0.015              | <0,0001           |

Table S2 – cont.

| Sensor | <i>Cantharellus cibarius</i> vs |                                |                        |                          |                             |                     |                              |                           |                          |
|--------|---------------------------------|--------------------------------|------------------------|--------------------------|-----------------------------|---------------------|------------------------------|---------------------------|--------------------------|
|        | <i>Craterellus lutescens</i>    | <i>Craterellus tubaeformis</i> | <i>Hydnum repandum</i> | <i>Hygrocybe helobia</i> | <i>Lactarius deliciosus</i> | <i>Lepista nuda</i> | <i>Pisolithus tinctorius</i> | <i>Suillus collinitus</i> | <i>Terfezia arenaria</i> |
| S1     | <0,0001                         | 0.055                          | <0,0001                | 0.055                    | <0,0001                     | <0,0001             | 0.400                        | 0.015                     | <0,0001                  |
| S2     | <0,0001                         | 0.055                          | <0,0001                | 0.003                    | <0,0001                     | <0,0001             | 0.759                        | 0.003                     | <0,0001                  |
| S3     | <0,0001                         | 0.055                          | <0,0001                | 0.001                    | <0,0001                     | <0,0001             | 0.055                        | 0.001                     | <0,0001                  |
| S4     | <0,0001                         | 0.400                          | 0.015                  | 0.164                    | <0,0001                     | <0,0001             | 0.988                        | 0.164                     | <0,0001                  |
| S5     | <0,0001                         | 0.055                          | <0,0001                | <0,0001                  | <0,0001                     | <0,0001             | 0.015                        | 0.003                     | <0,0001                  |
| S6     | <0,0001                         | 0.759                          | <0,0001                | 0.015                    | <0,0001                     | <0,0001             | 0.003                        | 0.003                     | <0,0001                  |
| S7     | <0,0001                         | 0.164                          | <0,0001                | 0.003                    | <0,0001                     | <0,0001             | 0.759                        | 0.003                     | <0,0001                  |
| S8     | <0,0001                         | 0.164                          | 0.003                  | 0.164                    | <0,0001                     | <0,0001             | 0.759                        | 0.015                     | <0,0001                  |
| S9     | <0,0001                         | 0.164                          | <0,0001                | <0,0001                  | <0,0001                     | <0,0001             | 0.003                        | 0.003                     | <0,0001                  |
| S10    | <0,0001                         | 0.164                          | <0,0001                | 0.015                    | <0,0001                     | <0,0001             | 0.164                        | 0.001                     | <0,0001                  |
| S11    | <0,0001                         | 0.055                          | <0,0001                | 0.015                    | <0,0001                     | <0,0001             | 0.055                        | 0.015                     | <0,0001                  |
| S12    | <0,0001                         | 0.055                          | <0,0001                | 0.055                    | <0,0001                     | <0,0001             | 0.400                        | 0.003                     | <0,0001                  |
| S13    | <0,0001                         | 0.164                          | 0.001                  | 0.015                    | <0,0001                     | <0,0001             | 0.759                        | 0.003                     | <0,0001                  |
| S14    | <0,0001                         | 0.055                          | <0,0001                | 0.015                    | <0,0001                     | <0,0001             | 0.759                        | 0.003                     | <0,0001                  |
| S15    | <0,0001                         | 0.055                          | <0,0001                | 0.001                    | <0,0001                     | <0,0001             | 0.164                        | 0.001                     | <0,0001                  |
| S16    | <0,0001                         | 0.055                          | <0,0001                | <0,0001                  | <0,0001                     | <0,0001             | 0.164                        | 0.001                     | <0,0001                  |
| S17    | <0,0001                         | 0.055                          | <0,0001                | <0,0001                  | <0,0001                     | <0,0001             | 0.055                        | 0.001                     | <0,0001                  |
| S18    | <0,0001                         | 0.164                          | <0,0001                | 0.001                    | <0,0001                     | <0,0001             | 0.055                        | 0.003                     | <0,0001                  |
| S19    | <0,0001                         | 0.400                          | <0,0001                | 0.015                    | <0,0001                     | <0,0001             | 0.759                        | 0.003                     | <0,0001                  |
| S20    | <0,0001                         | 0.400                          | <0,0001                | 0.015                    | <0,0001                     | <0,0001             | 0.400                        | 0.003                     | <0,0001                  |
| S21    | <0,0001                         | 0.055                          | <0,0001                | 0.015                    | <0,0001                     | <0,0001             | 0.759                        | 0.003                     | <0,0001                  |
| S22    | <0,0001                         | 0.015                          | <0,0001                | 0.001                    | <0,0001                     | <0,0001             | 0.759                        | 0.003                     | <0,0001                  |
| S23    | <0,0001                         | 0.055                          | <0,0001                | 0.001                    | <0,0001                     | <0,0001             | 0.400                        | 0.003                     | 0.015                    |
| S24    | <0,0001                         | 0.988                          | 0.001                  | 0.164                    | <0,0001                     | <0,0001             | 0.400                        | 0.003                     | <0,0001                  |
| S25    | <0,0001                         | 0.015                          | <0,0001                | <0,0001                  | <0,0001                     | <0,0001             | 0.001                        | 0.001                     | <0,0001                  |
| S26    | 0.001                           | 0.400                          | 0.001                  | 0.001                    | 0.001                       | 0.001               | 0.164                        | 0.015                     | <0,0001                  |
| S27    | <0,0001                         | 0.164                          | <0,0001                | 0.015                    | <0,0001                     | <0,0001             | 0.400                        | 0.003                     | <0,0001                  |
| S28    | <0,0001                         | 0.055                          | <0,0001                | <0,0001                  | <0,0001                     | <0,0001             | 0.055                        | 0.001                     | <0,0001                  |
| S29    | <0,0001                         | 0.055                          | <0,0001                | 0.015                    | <0,0001                     | <0,0001             | 0.400                        | 0.003                     | <0,0001                  |
| S30    | <0,0001                         | 0.164                          | 0.003                  | 0.055                    | <0,0001                     | <0,0001             | 0.164                        | <0,0001                   | 0.400                    |
| S31    | <0,0001                         | 0.164                          | <0,0001                | <0,0001                  | <0,0001                     | <0,0001             | <0,0001                      | 0.015                     | 0.164                    |
| S32    | <0,0001                         | 0.055                          | <0,0001                | 0.001                    | <0,0001                     | <0,0001             | 0.003                        | 0.003                     | <0,0001                  |

Table S2 – cont.

| Sensor | <i>Craterellus lutescens</i> vs |                        |                          |                             |                     |                              |                           |                          |
|--------|---------------------------------|------------------------|--------------------------|-----------------------------|---------------------|------------------------------|---------------------------|--------------------------|
|        | <i>Craterellus tubaeformis</i>  | <i>Hydnum repandum</i> | <i>Hygrocybe helobia</i> | <i>Lactarius deliciosus</i> | <i>Lepista nuda</i> | <i>Pisolithus tinctorius</i> | <i>Suillus collinitus</i> | <i>Terfezia arenaria</i> |
| S1     | <0,0001                         | <0,0001                | <0,0001                  | 0.003                       | 0.015               | <0,0001                      | <0,0001                   | <0,0001                  |
| S2     | <0,0001                         | <0,0001                | <0,0001                  | 0.015                       | 0.400               | <0,0001                      | <0,0001                   | <0,0001                  |
| S3     | <0,0001                         | <0,0001                | <0,0001                  | 0.164                       | 0.400               | <0,0001                      | <0,0001                   | <0,0001                  |
| S4     | <0,0001                         | <0,0001                | <0,0001                  | 0.003                       | 0.759               | <0,0001                      | 0.001                     | <0,0001                  |
| S5     | <0,0001                         | <0,0001                | <0,0001                  | 0.001                       | <0,0001             | <0,0001                      | <0,0001                   | <0,0001                  |
| S6     | <0,0001                         | <0,0001                | <0,0001                  | 0.003                       | 0.001               | <0,0001                      | <0,0001                   | <0,0001                  |
| S7     | <0,0001                         | <0,0001                | <0,0001                  | 0.015                       | 0.003               | <0,0001                      | <0,0001                   | <0,0001                  |
| S8     | <0,0001                         | <0,0001                | <0,0001                  | 0.164                       | 0.164               | <0,0001                      | 0.001                     | <0,0001                  |
| S9     | <0,0001                         | <0,0001                | <0,0001                  | 0.001                       | 0.001               | <0,0001                      | <0,0001                   | <0,0001                  |
| S10    | <0,0001                         | <0,0001                | <0,0001                  | 0.001                       | <0,0001             | <0,0001                      | <0,0001                   | <0,0001                  |
| S11    | <0,0001                         | <0,0001                | <0,0001                  | 0.003                       | 0.055               | <0,0001                      | <0,0001                   | <0,0001                  |
| S12    | <0,0001                         | <0,0001                | <0,0001                  | 0.001                       | <0,0001             | <0,0001                      | <0,0001                   | <0,0001                  |
| S13    | <0,0001                         | <0,0001                | <0,0001                  | 0.003                       | 0.003               | <0,0001                      | <0,0001                   | <0,0001                  |
| S14    | <0,0001                         | <0,0001                | <0,0001                  | 0.003                       | 0.003               | <0,0001                      | <0,0001                   | <0,0001                  |
| S15    | <0,0001                         | <0,0001                | <0,0001                  | 0.001                       | <0,0001             | <0,0001                      | <0,0001                   | <0,0001                  |
| S16    | <0,0001                         | <0,0001                | <0,0001                  | 0.003                       | 0.001               | <0,0001                      | <0,0001                   | <0,0001                  |
| S17    | <0,0001                         | <0,0001                | <0,0001                  | 0.001                       | <0,0001             | <0,0001                      | <0,0001                   | <0,0001                  |
| S18    | <0,0001                         | <0,0001                | <0,0001                  | 0.001                       | 0.001               | <0,0001                      | <0,0001                   | <0,0001                  |
| S19    | <0,0001                         | <0,0001                | <0,0001                  | 0.001                       | 0.055               | <0,0001                      | <0,0001                   | <0,0001                  |
| S20    | <0,0001                         | <0,0001                | <0,0001                  | 0.001                       | <0,0001             | <0,0001                      | <0,0001                   | <0,0001                  |
| S21    | <0,0001                         | <0,0001                | <0,0001                  | 0.001                       | 0.003               | <0,0001                      | <0,0001                   | <0,0001                  |
| S22    | <0,0001                         | <0,0001                | <0,0001                  | 0.001                       | <0,0001             | <0,0001                      | <0,0001                   | <0,0001                  |
| S23    | <0,0001                         | <0,0001                | <0,0001                  | 0.001                       | <0,0001             | <0,0001                      | <0,0001                   | <0,0001                  |
| S24    | <0,0001                         | 0.015                  | <0,0001                  | 0.003                       | 0.015               | <0,0001                      | 0.001                     | <0,0001                  |
| S25    | <0,0001                         | <0,0001                | <0,0001                  | 0.001                       | 0.001               | <0,0001                      | <0,0001                   | <0,0001                  |
| S26    | <0,0001                         | 0.015                  | 0.015                    | 0.003                       | 0.003               | 0.003                        | 0.003                     | <0,0001                  |
| S27    | <0,0001                         | <0,0001                | <0,0001                  | 0.001                       | 0.001               | <0,0001                      | <0,0001                   | <0,0001                  |
| S28    | <0,0001                         | <0,0001                | <0,0001                  | 0.001                       | <0,0001             | <0,0001                      | <0,0001                   | <0,0001                  |
| S29    | <0,0001                         | <0,0001                | <0,0001                  | 0.001                       | 0.001               | <0,0001                      | <0,0001                   | <0,0001                  |
| S30    | 0.001                           | 0.164                  | <0,0001                  | 0.759                       | 0.055               | 0.001                        | 0.015                     | 0.055                    |
| S31    | <0,0001                         | <0,0001                | <0,0001                  | 0.001                       | <0,0001             | <0,0001                      | <0,0001                   | <0,0001                  |
| S32    | <0,0001                         | <0,0001                | <0,0001                  | 0.001                       | 0.003               | <0,0001                      | <0,0001                   | <0,0001                  |

Table S2 – cont.

| <i>Craterellus tubaeformis</i> vs |                        |                          |                             |                     |                              |                           |                          |
|-----------------------------------|------------------------|--------------------------|-----------------------------|---------------------|------------------------------|---------------------------|--------------------------|
| Sensor                            | <i>Hydnum repandum</i> | <i>Hygrocybe helobia</i> | <i>Lactarius deliciosus</i> | <i>Lepista nuda</i> | <i>Pisolithus tinctorius</i> | <i>Suillus collinitus</i> | <i>Terfezia arenaria</i> |
| S1                                | 0.003                  | 0.759                    | <0,0001                     | <0,0001             | 0.015                        | 0.164                     | <0,0001                  |
| S2                                | 0.003                  | 0.400                    | <0,0001                     | <0,0001             | 0.055                        | 0.055                     | <0,0001                  |
| S3                                | 0.003                  | 0.164                    | <0,0001                     | <0,0001             | 0.400                        | 0.015                     | <0,0001                  |
| S4                                | 0.003                  | 0.400                    | <0,0001                     | <0,0001             | 0.164                        | 0.055                     | <0,0001                  |
| S5                                | <0,0001                | 0.164                    | <0,0001                     | <0,0001             | 0.400                        | 0.015                     | <0,0001                  |
| S6                                | <0,0001                | 0.055                    | <0,0001                     | <0,0001             | 0.015                        | 0.003                     | 0.003                    |
| S7                                | 0.015                  | 0.164                    | <0,0001                     | <0,0001             | 0.164                        | 0.003                     | <0,0001                  |
| S8                                | 0.400                  | 0.988                    | <0,0001                     | <0,0001             | 0.055                        | 0.400                     | <0,0001                  |
| S9                                | 0.003                  | 0.164                    | <0,0001                     | <0,0001             | 0.400                        | 0.015                     | <0,0001                  |
| S10                               | 0.001                  | 0.400                    | <0,0001                     | <0,0001             | 0.055                        | 0.003                     | <0,0001                  |
| S11                               | 0.003                  | 0.164                    | <0,0001                     | <0,0001             | 0.055                        | 0.015                     | <0,0001                  |
| S12                               | 0.015                  | 0.400                    | <0,0001                     | <0,0001             | 0.015                        | 0.015                     | <0,0001                  |
| S13                               | 0.164                  | 0.400                    | <0,0001                     | <0,0001             | 0.055                        | 0.015                     | <0,0001                  |
| S14                               | 0.001                  | 0.400                    | <0,0001                     | <0,0001             | 0.055                        | 0.015                     | <0,0001                  |
| S15                               | 0.015                  | 0.400                    | <0,0001                     | <0,0001             | 0.055                        | 0.015                     | <0,0001                  |
| S16                               | <0,0001                | 0.400                    | <0,0001                     | <0,0001             | 0.164                        | 0.003                     | <0,0001                  |
| S17                               | 0.001                  | 0.164                    | <0,0001                     | <0,0001             | 0.164                        | 0.003                     | <0,0001                  |
| S18                               | <0,0001                | 0.164                    | <0,0001                     | <0,0001             | 0.400                        | 0.003                     | <0,0001                  |
| S19                               | 0.001                  | 0.400                    | <0,0001                     | <0,0001             | 0.164                        | 0.003                     | <0,0001                  |
| S20                               | 0.003                  | 0.400                    | <0,0001                     | <0,0001             | 0.400                        | 0.055                     | <0,0001                  |
| S21                               | 0.001                  | 0.759                    | <0,0001                     | <0,0001             | 0.015                        | 0.003                     | 0.001                    |
| S22                               | 0.003                  | 0.759                    | <0,0001                     | <0,0001             | 0.015                        | 0.015                     | 0.001                    |
| S23                               | <0,0001                | 0.400                    | <0,0001                     | <0,0001             | 0.055                        | 0.015                     | 0.003                    |
| S24                               | 0.003                  | 0.164                    | <0,0001                     | <0,0001             | 0.164                        | 0.015                     | 0.001                    |
| S25                               | 0.001                  | 0.055                    | <0,0001                     | <0,0001             | 0.759                        | 0.003                     | <0,0001                  |
| S26                               | 0.001                  | 0.055                    | <0,0001                     | <0,0001             | 0.400                        | 0.015                     | <0,0001                  |
| S27                               | 0.001                  | 0.400                    | <0,0001                     | <0,0001             | 0.015                        | 0.055                     | <0,0001                  |
| S28                               | 0.001                  | 0.400                    | <0,0001                     | <0,0001             | 0.164                        | 0.015                     | <0,0001                  |
| S29                               | <0,0001                | 0.759                    | <0,0001                     | <0,0001             | 0.055                        | 0.015                     | <0,0001                  |
| S30                               | 0.003                  | 0.988                    | 0.001                       | 0.001               | 0.015                        | 0.001                     | 0.164                    |
| S31                               | <0,0001                | 0.015                    | <0,0001                     | <0,0001             | 0.164                        | 0.759                     | 0.400                    |
| S32                               | <0,0001                | 0.400                    | <0,0001                     | <0,0001             | 0.400                        | 0.015                     | <0,0001                  |



Table S2 – cont.

| Sensor | <i>Hydnum repandum</i> vs |                             |                     |                              |                           |                          | <i>Hygrocybe helobia</i> vs |                     |                              |                           |                          |
|--------|---------------------------|-----------------------------|---------------------|------------------------------|---------------------------|--------------------------|-----------------------------|---------------------|------------------------------|---------------------------|--------------------------|
|        | <i>Hygrocybe helobia</i>  | <i>Lactarius deliciosus</i> | <i>Lepista nuda</i> | <i>Pisolithus tinctorius</i> | <i>Suillus collinitus</i> | <i>Terfezia arenaria</i> | <i>Lactarius deliciosus</i> | <i>Lepista nuda</i> | <i>Pisolithus tinctorius</i> | <i>Suillus collinitus</i> | <i>Terfezia arenaria</i> |
| S1     | 0.001                     | <0,0001                     | <0,0001             | <0,0001                      | 0.400                     | <0,0001                  | <0,0001                     | <0,0001             | 0.001                        | 0.055                     | <0,0001                  |
| S2     | 0.001                     | <0,0001                     | <0,0001             | <0,0001                      | 0.164                     | <0,0001                  | <0,0001                     | <0,0001             | 0.055                        | 0.055                     | <0,0001                  |
| S3     | 0.015                     | <0,0001                     | <0,0001             | <0,0001                      | 0.055                     | <0,0001                  | <0,0001                     | <0,0001             | 0.055                        | 0.015                     | <0,0001                  |
| S4     | 0.055                     | 0.001                       | <0,0001             | 0.003                        | 0.759                     | <0,0001                  | <0,0001                     | <0,0001             | 0.400                        | 0.400                     | <0,0001                  |
| S5     | 0.001                     | <0,0001                     | <0,0001             | <0,0001                      | 0.015                     | <0,0001                  | <0,0001                     | <0,0001             | 0.001                        | 0.015                     | <0,0001                  |
| S6     | <0,0001                   | <0,0001                     | <0,0001             | <0,0001                      | 0.400                     | <0,0001                  | <0,0001                     | <0,0001             | 0.759                        | 0.001                     | 0.001                    |
| S7     | 0.003                     | <0,0001                     | <0,0001             | <0,0001                      | 0.164                     | <0,0001                  | <0,0001                     | <0,0001             | 0.001                        | 0.003                     | <0,0001                  |
| S8     | 0.400                     | <0,0001                     | <0,0001             | 0.001                        | 0.759                     | <0,0001                  | <0,0001                     | <0,0001             | 0.055                        | 0.400                     | <0,0001                  |
| S9     | 0.003                     | <0,0001                     | <0,0001             | <0,0001                      | 0.015                     | <0,0001                  | <0,0001                     | <0,0001             | 0.164                        | 0.015                     | <0,0001                  |
| S10    | 0.003                     | <0,0001                     | <0,0001             | <0,0001                      | 0.055                     | <0,0001                  | <0,0001                     | <0,0001             | 0.015                        | 0.003                     | <0,0001                  |
| S11    | <0,0001                   | <0,0001                     | <0,0001             | <0,0001                      | 0.055                     | <0,0001                  | <0,0001                     | <0,0001             | 0.015                        | 0.015                     | <0,0001                  |
| S12    | <0,0001                   | <0,0001                     | <0,0001             | <0,0001                      | 0.055                     | <0,0001                  | <0,0001                     | <0,0001             | 0.001                        | 0.003                     | <0,0001                  |
| S13    | 0.015                     | <0,0001                     | <0,0001             | <0,0001                      | 0.164                     | <0,0001                  | <0,0001                     | <0,0001             | 0.003                        | 0.015                     | <0,0001                  |
| S14    | <0,0001                   | <0,0001                     | <0,0001             | <0,0001                      | 0.055                     | <0,0001                  | <0,0001                     | <0,0001             | <0,0001                      | 0.003                     | <0,0001                  |
| S15    | 0.003                     | <0,0001                     | <0,0001             | <0,0001                      | 0.015                     | <0,0001                  | <0,0001                     | <0,0001             | 0.001                        | 0.015                     | <0,0001                  |
| S16    | <0,0001                   | <0,0001                     | <0,0001             | <0,0001                      | 0.015                     | <0,0001                  | <0,0001                     | <0,0001             | 0.003                        | 0.003                     | <0,0001                  |
| S17    | 0.001                     | <0,0001                     | <0,0001             | <0,0001                      | 0.015                     | <0,0001                  | <0,0001                     | <0,0001             | 0.001                        | 0.003                     | <0,0001                  |
| S18    | 0.001                     | <0,0001                     | <0,0001             | <0,0001                      | 0.055                     | <0,0001                  | <0,0001                     | <0,0001             | 0.003                        | 0.015                     | <0,0001                  |
| S19    | 0.001                     | <0,0001                     | <0,0001             | <0,0001                      | 0.055                     | <0,0001                  | <0,0001                     | <0,0001             | 0.055                        | 0.003                     | <0,0001                  |
| S20    | 0.001                     | <0,0001                     | <0,0001             | <0,0001                      | 0.759                     | <0,0001                  | <0,0001                     | <0,0001             | 0.015                        | 0.015                     | <0,0001                  |
| S21    | 0.001                     | <0,0001                     | <0,0001             | <0,0001                      | 0.015                     | <0,0001                  | <0,0001                     | <0,0001             | 0.003                        | 0.003                     | <0,0001                  |
| S22    | 0.001                     | <0,0001                     | <0,0001             | <0,0001                      | 0.164                     | <0,0001                  | <0,0001                     | <0,0001             | 0.001                        | 0.015                     | <0,0001                  |
| S23    | <0,0001                   | <0,0001                     | <0,0001             | <0,0001                      | 0.164                     | <0,0001                  | <0,0001                     | <0,0001             | 0.001                        | 0.015                     | <0,0001                  |
| S24    | 0.003                     | 0.015                       | 0.055               | <0,0001                      | 0.988                     | <0,0001                  | <0,0001                     | <0,0001             | 0.003                        | 0.003                     | <0,0001                  |
| S25    | 0.015                     | <0,0001                     | <0,0001             | 0.001                        | 0.015                     | <0,0001                  | <0,0001                     | <0,0001             | 0.055                        | 0.003                     | <0,0001                  |
| S26    | 0.055                     | 0.055                       | 0.055               | 0.003                        | 0.055                     | <0,0001                  | 0.015                       | 0.015               | 0.164                        | 0.400                     | <0,0001                  |
| S27    | <0,0001                   | <0,0001                     | <0,0001             | <0,0001                      | 0.400                     | <0,0001                  | <0,0001                     | <0,0001             | <0,0001                      | 0.015                     | <0,0001                  |
| S28    | <0,0001                   | <0,0001                     | <0,0001             | <0,0001                      | 0.015                     | <0,0001                  | <0,0001                     | <0,0001             | 0.003                        | 0.003                     | <0,0001                  |
| S29    | <0,0001                   | <0,0001                     | <0,0001             | <0,0001                      | 0.164                     | <0,0001                  | <0,0001                     | <0,0001             | 0.003                        | 0.015                     | <0,0001                  |
| S30    | <0,0001                   | 0.164                       | 0.164               | 0.015                        | 0.400                     | 0.055                    | <0,0001                     | <0,0001             | 0.003                        | <0,0001                   | 0.055                    |
| S31    | 0.001                     | <0,0001                     | <0,0001             | <0,0001                      | <0,0001                   | <0,0001                  | <0,0001                     | <0,0001             | 0.003                        | 0.164                     | <0,0001                  |
| S32    | 0.001                     | <0,0001                     | <0,0001             | <0,0001                      | 0.055                     | <0,0001                  | <0,0001                     | <0,0001             | 0.055                        | 0.015                     | <0,0001                  |

Table S2 – cont.

| Sensor | <i>Lactarius deliciosus</i> vs |                              |                           |                          | <i>Lepista nuda</i> vs       |                           |                          | <i>Pisolithus tinctorius</i> vs |                          | <i>Suillus collinitus</i> vs |
|--------|--------------------------------|------------------------------|---------------------------|--------------------------|------------------------------|---------------------------|--------------------------|---------------------------------|--------------------------|------------------------------|
|        | <i>Lepista nuda</i>            | <i>Pisolithus tinctorius</i> | <i>Suillus collinitus</i> | <i>Terfezia arenaria</i> | <i>Pisolithus tinctorius</i> | <i>Suillus collinitus</i> | <i>Terfezia arenaria</i> | <i>Suillus collinitus</i>       | <i>Terfezia arenaria</i> | <i>Terfezia arenaria</i>     |
| S1     | 0.164                          | <0,0001                      | <0,0001                   | <0,0001                  | <0,0001                      | <0,0001                   | <0,0001                  | 0.015                           | <0,0001                  | <0,0001                      |
| S2     | 0.400                          | <0,0001                      | <0,0001                   | <0,0001                  | <0,0001                      | <0,0001                   | <0,0001                  | 0.003                           | <0,0001                  | <0,0001                      |
| S3     | 0.759                          | <0,0001                      | <0,0001                   | <0,0001                  | <0,0001                      | <0,0001                   | <0,0001                  | 0.015                           | <0,0001                  | <0,0001                      |
| S4     | 0.001                          | <0,0001                      | 0.001                     | <0,0001                  | <0,0001                      | 0.001                     | <0,0001                  | 0.164                           | <0,0001                  | <0,0001                      |
| S5     | 0.164                          | <0,0001                      | <0,0001                   | <0,0001                  | <0,0001                      | <0,0001                   | <0,0001                  | 0.003                           | <0,0001                  | <0,0001                      |
| S6     | 0.400                          | <0,0001                      | <0,0001                   | <0,0001                  | <0,0001                      | <0,0001                   | <0,0001                  | 0.001                           | 0.001                    | 0.001                        |
| S7     | 0.759                          | <0,0001                      | <0,0001                   | <0,0001                  | <0,0001                      | <0,0001                   | <0,0001                  | 0.003                           | <0,0001                  | <0,0001                      |
| S8     | 0.988                          | <0,0001                      | 0.003                     | <0,0001                  | <0,0001                      | 0.001                     | <0,0001                  | 0.003                           | <0,0001                  | <0,0001                      |
| S9     | 0.055                          | <0,0001                      | <0,0001                   | <0,0001                  | <0,0001                      | <0,0001                   | <0,0001                  | 0.003                           | <0,0001                  | <0,0001                      |
| S10    | 0.164                          | <0,0001                      | <0,0001                   | <0,0001                  | <0,0001                      | <0,0001                   | <0,0001                  | 0.001                           | <0,0001                  | <0,0001                      |
| S11    | 0.055                          | <0,0001                      | <0,0001                   | <0,0001                  | <0,0001                      | <0,0001                   | <0,0001                  | 0.015                           | <0,0001                  | <0,0001                      |
| S12    | 0.400                          | <0,0001                      | <0,0001                   | <0,0001                  | <0,0001                      | <0,0001                   | <0,0001                  | 0.001                           | <0,0001                  | <0,0001                      |
| S13    | 0.164                          | <0,0001                      | <0,0001                   | <0,0001                  | <0,0001                      | <0,0001                   | <0,0001                  | 0.001                           | <0,0001                  | <0,0001                      |
| S14    | 0.400                          | <0,0001                      | <0,0001                   | <0,0001                  | <0,0001                      | <0,0001                   | <0,0001                  | 0.001                           | <0,0001                  | <0,0001                      |
| S15    | 0.164                          | <0,0001                      | <0,0001                   | <0,0001                  | <0,0001                      | <0,0001                   | <0,0001                  | 0.001                           | <0,0001                  | <0,0001                      |
| S16    | 0.164                          | <0,0001                      | <0,0001                   | <0,0001                  | <0,0001                      | <0,0001                   | <0,0001                  | 0.003                           | <0,0001                  | <0,0001                      |
| S17    | 0.055                          | <0,0001                      | <0,0001                   | <0,0001                  | <0,0001                      | <0,0001                   | <0,0001                  | 0.003                           | <0,0001                  | <0,0001                      |
| S18    | 0.055                          | <0,0001                      | <0,0001                   | <0,0001                  | <0,0001                      | <0,0001                   | <0,0001                  | 0.003                           | <0,0001                  | <0,0001                      |
| S19    | 0.164                          | <0,0001                      | <0,0001                   | <0,0001                  | <0,0001                      | <0,0001                   | <0,0001                  | 0.001                           | <0,0001                  | <0,0001                      |
| S20    | 0.400                          | <0,0001                      | <0,0001                   | <0,0001                  | <0,0001                      | <0,0001                   | <0,0001                  | 0.003                           | <0,0001                  | <0,0001                      |
| S21    | 0.164                          | <0,0001                      | <0,0001                   | <0,0001                  | <0,0001                      | <0,0001                   | <0,0001                  | 0.003                           | <0,0001                  | <0,0001                      |
| S22    | 0.759                          | <0,0001                      | <0,0001                   | <0,0001                  | <0,0001                      | <0,0001                   | <0,0001                  | 0.003                           | <0,0001                  | <0,0001                      |
| S23    | 0.164                          | <0,0001                      | <0,0001                   | <0,0001                  | <0,0001                      | <0,0001                   | <0,0001                  | 0.003                           | <0,0001                  | 0.001                        |
| S24    | 0.759                          | <0,0001                      | 0.001                     | <0,0001                  | <0,0001                      | 0.003                     | <0,0001                  | 0.001                           | 0.001                    | <0,0001                      |
| S25    | 0.164                          | <0,0001                      | <0,0001                   | <0,0001                  | <0,0001                      | <0,0001                   | <0,0001                  | 0.003                           | <0,0001                  | <0,0001                      |
| S26    | 0.400                          | 0.003                        | 0.003                     | <0,0001                  | 0.003                        | 0.003                     | <0,0001                  | 0.055                           | <0,0001                  | <0,0001                      |
| S27    | 0.759                          | <0,0001                      | <0,0001                   | <0,0001                  | <0,0001                      | <0,0001                   | <0,0001                  | 0.003                           | <0,0001                  | <0,0001                      |
| S28    | 0.164                          | <0,0001                      | <0,0001                   | <0,0001                  | <0,0001                      | <0,0001                   | <0,0001                  | 0.003                           | <0,0001                  | <0,0001                      |
| S29    | 0.164                          | <0,0001                      | <0,0001                   | <0,0001                  | <0,0001                      | <0,0001                   | <0,0001                  | 0.003                           | <0,0001                  | <0,0001                      |
| S30    | 0.055                          | 0.001                        | 0.015                     | 0.055                    | 0.001                        | 0.164                     | 0.055                    | 0.001                           | 0.400                    | 0.055                        |
| S31    | 0.759                          | <0,0001                      | <0,0001                   | <0,0001                  | <0,0001                      | <0,0001                   | <0,0001                  | 0.400                           | 0.003                    | 0.164                        |
| S32    | 0.400                          | <0,0001                      | <0,0001                   | <0,0001                  | <0,0001                      | <0,0001                   | <0,0001                  | 0.015                           | <0,0001                  | <0,0001                      |
